# Supplementary material
Source: publisher site journal article supplement (https://www.dovepress.com/get_supplementary_file.php?f=459865.docx)
Supplement: Supplementary file 1 [file get_supplementary_file.php]

**Supplementary Information**

**Table S1** Factor Loadings of Critical Thinking Disposition (n = 416)

| Items | Factor | | | | | | | | | | | | | | Cronbach α | |
| --- | --- | --- | --- | --- | --- | --- | --- | --- | --- | --- | --- | --- | --- | --- | --- | --- |
| 1 | 2 | | 3 | | 4 | | 5 | | 6 | | 7 | | 8 |
| 3 Intellectual integrity | **.780** | .070 | | .115 | | .095 | | .088 | | .051 | | .170 | | .095 | .85 | |
| 2 Intellectual integrity | **.755** | .028 | | -.001 | | -.023 | | .059 | | .084 | | .089 | | .241 |
| 1 Intellectual integrity | **.731** | .129 | | .043 | | .105 | | .126 | | .060 | | .039 | | .014 |
| 6 Intellectual integrity | **.715** | -.033 | | .175 | | .176 | | -.027 | | .162 | | .108 | | .049 |
| 4 Intellectual integrity | **.651** | .071 | | .176 | | .169 | | .071 | | .184 | | .169 | | -.043 |
| 5 Intellectual integrity | **.564** | .359 | | .122 | | .288 | | .094 | | .127 | | .070 | | -.045 |
| 10 Creativity | .000 | **.854** | | .167 | | .110 | | .126 | | .012 | | -.025 | | .070 | .85 | |
| 9 Creativity | .027 | **.841** | | .053 | | .139 | | .126 | | -.031 | | -.047 | | .102 |
| 7 Creativity | .152 | **.776** | | .075 | | -.061 | | -.033 | | -.047 | | .065 | | .071 |
| 8 Creativity | .108 | **.713** | | .128 | | .117 | | -.009 | | .080 | | .111 | | .170 |
| 14 Challenge | .166 | .081 | | **.722** | | .018 | | .021 | | -.026 | | .144 | | .009 | .74 | |
| 15 Challenge | .127 | .219 | | **.686** | | -.002 | | -.101 | | .017 | | .070 | | .189 |
| 13 Challenge | .151 | -.040 | | **.648** | | .111 | | .133 | | .087 | | .159 | | .234 |
| 16 Challenge | .078 | .243 | | **.606** | | .116 | | .268 | | .004 | | -.092 | | -.231 |
| 11 Challenge | -.063 | .108 | | **.592** | | .066 | | .155 | | .143 | | .061 | | .444 |
| 29 Truth-seeking | .235 | .038 | | .089 | | **.753** | | .146 | | .097 | | .060 | | .082 | .70 | |
| 28 Truth-seeking | .107 | .250 | | .044 | | **.707** | | .013 | | .080 | | .023 | | .138 |
| 30 Truth-seeking | .227 | .012 | | .085 | | **.670** | | .239 | | .154 | | .211 | | .107 |
| 18 Open-mindedness | .091 | .000 | | .065 | | .239 | | **.770** | | -.073 | | -.020 | | .125 | .63 | |
| 17 Open-mindedness | .092 | .088 | | .127 | | .036 | | **.754** | | .106 | | .208 | | -.108 |
| 19 Open-mindedness | .152 | .122 | | .052 | | .059 | | **.588** | | .274 | | .057 | | .198 |
| 22 Prudence | .211 | -.122 | | .215 | | .014 | | .021 | | **.787** | | .046 | | -.024 | .65 | |
| 21 Prudence | .158 | .162 | | -.078 | | .221 | | .124 | | **.723** | | .212 | | .002 |
| 20 Prudence | .433 | -.033 | | -.032 | | .191 | | .178 | | **.499** | | -.003 | | .085 |
| 26 Objectivity | .346 | .122 | | .106 | | .118 | | .223 | | .007 | | **.691** | | -.020 | .63 | |
| 25 Objectivity | .028 | .039 | | .371 | | .153 | | .040 | | .193 | | **.681** | | -.123 |
| 27 Objectivity | .301 | -.037 | | .006 | | .028 | | .036 | | .103 | | **.654** | | .329 |
| 32 Inquisitiveness | .088 | .314 | | .253 | | .110 | | .118 | | -.007 | | .081 | | **.674** | .62 | |
| 35 Inquisitiveness | .214 | .196 | | .113 | | .259 | | .035 | | -.020 | | -.013 | | **.606** |
| Eigenvalue | 3.758 | | 3.114 | | 2.592 | | 2.023 | | 1.900 | 1.700 | 1.683 | | 1.520 | | |  | |
| Variance % | 12.960 | | 10.737 | | 8.939 | | 6.975 | | 6.553 | 5.861 | 5.804 | | 5.240 | | |  | |
| KMO=0.873, Bartlett’s χ2=4391.485, df=406, p<0.001 | | | | | | | | | | | | | | | | | |

**Notes:** The 8 factor 29 items were retained as the best outcome of the factor analysis

The items in bold within the gray boxes represent the variables of the proposed factor structure.

**Table S2** Factor Loadings of Problem-Solving Ability (n = 416)

| Items | Factor | | | Cronbach α |
| --- | --- | --- | --- | --- |
| 1 | 2 | 3 |
| 7 Problem-solving confidence | **.856** | .127 | .134 | .85 |
| 8 Problem-solving confidence | **.832** | .126 | .117 |
| 5 Problem-solving confidence | **.708** | .243 | -.010 |
| 6 Problem-solving confidence | **.693** | .058 | .123 |
| 2 Problem-solving confidence | **.688** | .223 | .166 |
| 10 Problem-solving confidence | **.579** | -.016 | .458 |
| 22 Approach-avoidance style | .017 | **.778** | .152 | .74 |
| 23 Approach-avoidance style | .099 | **.751** | .029 |
| 17 Approach-avoidance style | .198 | **.640** | .019 |
| 25 Approach-avoidance style | .139 | **.598** | .275 |
| 27 Approach-avoidance style | .213 | **.567** | .322 |
| 32 Personal control | .050 | .180 | **.787** | .70 |
| 31 Personal control | .080 | .190 | **.748** |
| 30 Personal control | .333 | .129 | **.671** |
| Eigenvalue | 3.448 | 2.487 | 2.118 |  |
| Variance % | 24.626 | 17.765 | 15.128 |  |
| KMO=0.873, Bartlett’s χ2=1974.407, df=91, p<0.001 | | | | |

**Notes:** The 3 factor 14 items were retained as the best outcome of the factor analysis

The items in bold within the gray boxes represent the variables of the proposed factor structure.

**Table S3** Factor Loadings of Personality Traits (n = 416)

| Items | Factor | | | | Cronbach α |
| --- | --- | --- | --- | --- | --- |
| 1 | 2 | 3 | 4 |
| 11 Extroversion | **.825** | .205 | -.190 | .021 | .89 |
| 5 Extroversion | **.782** | .156 | .040 | -.058 |
| 8 Extroversion | **.781** | .114 | -.305 | .023 |
| 4 Extroversion | **.760** | .111 | -.067 | .035 |
| 1 Extroversion | **.736** | .169 | .006 | -.114 |
| 7 Extroversion | **.684** | .197 | -.246 | .134 |
| 3 Extroversion | **.566** | -.021 | -.451 | .075 |
| 9 Extroversion | **.559** | -.071 | -.458 | .054 |
| 7 Conscientiousness | .310 | **.732** | -.059 | .078 | .85 |
| 5 Conscientiousness | .114 | **.713** | -.172 | .165 |
| 4 Conscientiousness | -.021 | **.701** | -.081 | .084 |
| 12 Conscientiousness | .314 | **.685** | -.022 | .076 |
| 2 Conscientiousness | .037 | **.669** | -.156 | -.022 |
| 8 Conscientiousness | .195 | **.658** | -.085 | .060 |
| 10 Conscientiousness | .139 | **.640** | -.219 | .044 |
| 3 Conscientiousness | -.108 | **.548** | -.376 | .061 |
| 5 Neuroticism | -.200 | .089 | **.704** | .134 | .83 |
| 3 Neuroticism | -.056 | -.054 | **.688** | .066 |
| 6 Neuroticism | -.148 | -.270 | **.670** | .023 |
| 2 Neuroticism | -.249 | -.220 | **.647** | -.012 |
| 12 Neuroticism | -.028 | -.179 | **.626** | .095 |
| 9 Neuroticism | -.098 | -.382 | **.615** | -.079 |
| 11 Neuroticism | -.182 | -.335 | **.556** | -.071 |
| 9 Openness | .023 | -.031 | .074 | **.745** | .77 |
| 3 Openness | .147 | .104 | .101 | **.732** |
| 10 Openness | -.118 | .023 | .004 | **.680** |
| 5 Openness | -.027 | .026 | -.179 | **.664** |
| 12 Openness | .023 | .108 | .138 | **.631** |
| 11 Openness | .054 | .380 | -.003 | **.555** |
| Eigenvalue | 4.609 | 4.353 | 3.850 | 2.844 |  |
| Variance % | 15.893 | 15.010 | 13.278 | 9.808 |  |
| KMO=0.891, Bartlett’s χ2=5324.188, df=406, p<0.001 | | | | | |

**Notes:** The 4 factor 29 items were retained as the best outcome of the factor analysis

The items in bold within the gray boxes represent the variables of the proposed factor structure.

**Table S4** Factor Loadings of Communication Competence (n = 416)

| Items | Factor | Cronbach α |
| --- | --- | --- |
| 1 |
| Communication competence |  | .84 |
| Eigenvalue | 4.725 |  |
| Variance % | 31.498 |  |
| KMO=0.867, Bartlett’s χ2=1580.960, df=105, p<0.001 | | |

**Notes:** The 1 factor 15 items were retained as the best outcome of the factor analysis

**Table S5** Factor Loadings of Leadership (n = 416)

| Items | Factor | | | | | Cronbach α |
| --- | --- | --- | --- | --- | --- | --- |
| 1 | 2 | 3 | 4 | 5 |
| 13 Recreative ability | **.867** | .106 | .077 | .017 | .047 | .91 |
| 12 Recreative ability | **.867** | .044 | .005 | .102 | .046 |
| 11 Recreative ability | **.804** | .084 | .216 | .019 | .006 |
| 14 Recreative ability | **.754** | .081 | .283 | .038 | .020 |
| 18 Recreative ability | **.735** | -.002 | -.127 | .101 | .053 |
| 15 Recreative ability | **.690** | .089 | .320 | .198 | .018 |
| 19 Recreative ability | **.653** | .126 | .044 | .155 | .225 |
| 16 Recreative ability | **.618** | -.009 | .210 | -.055 | .078 |
| 17 Recreative ability | **.614** | .233 | .131 | -.046 | .076 |
| 49 Sense of purpose | .088 | **.780** | .068 | .045 | .115 | .86 |
| 47 Sense of purpose | .038 | **.772** | .115 | .175 | .048 |
| 48 Sense of purpose | .124 | **.743** | -.014 | .161 | .065 |
| 42 Sense of purpose | .162 | **.648** | .300 | .178 | .039 |
| 50 Sense of purpose | .059 | **.639** | .294 | .288 | .054 |
| 44 Sense of purpose | .084 | **.565** | .473 | .126 | .056 |
| 46 Sense of purpose | .105 | **.560** | .248 | .290 | .081 |
| 2 Goal achievement | .043 | .256 | **.744** | .061 | .085 | .83 |
| 6 Goal achievement | .184 | .124 | **.710** | .284 | .084 |
| 4 Goal achievement | .137 | .138 | **.681** | .139 | .086 |
| 3 Goal achievement | .187 | .307 | **.639** | .056 | .123 |
| 5 Goal achievement | .344 | .046 | **.624** | .224 | .081 |
| 22 Command | .012 | .261 | .125 | **.767** | -.059 | .81 |
| 23 Command | .053 | .216 | .122 | **.745** | .092 |
| 25 Command | .058 | .285 | .082 | **.741** | .028 |
| 24 Command | .134 | .091 | .436 | **.570** | .171 |
| 21 Command | .160 | .124 | .381 | **.517** | .100 |
| 32 Social relationships | .034 | .066 | .006 | .017 | **.796** | .79 |
| 31 Social relationships | .091 | -.005 | .041 | .122 | **.788** |
| 34 Social relationships | .057 | .091 | .098 | .104 | **.717** |
| 39 Social relationships | .219 | .049 | .080 | .045 | **.683** |
| 33 Social relationships | -.012 | .114 | .158 | -.075 | **.627** |
| Eigenvalue | 5.311 | 3.769 | 3.528 | 2.840 | 2.829 |  |
| Variance % | 17.133 | 12.158 | 11.381 | 9.161 | 9.125 |  |
| KMO=0.899, Bartlett’s χ2=6422.688, df=465, p<0.001 | | | | | | |

**Notes:** The 5 factor 31 items were retained as the best outcome of the factor analysis

The items in bold within the gray boxes represent the variables of the proposed factor structure.
